1 Mapping the genetic and environmental aetiology of autistic traits in Sweden and  
2 the UK

3 Zoe E. Reed<sup>1,2\*</sup>, Henrik Larsson<sup>4,5</sup>, Claire M.A. Haworth<sup>1,2,3,6,7</sup>, Dheeraj Rai<sup>2,3,8</sup>,  
4 Sebastian Lundström<sup>9</sup>, Angelica Ronald<sup>10</sup>, Abraham Reichenberg<sup>11</sup>, Paul  
5 Lichtenstein<sup>12</sup>, Oliver S.P. Davis<sup>1,2,3,7</sup>

6 \* Corresponding author

7 1) MRC Integrative Epidemiology Unit, University of Bristol, UK

8 2) Department of Population Health Sciences, Bristol Medical School, University  
9 of Bristol, UK

10 3) National Institute for Health Research Biomedical Research Centre, University  
11 Hospitals Bristol NHS Foundation Trust and the University of Bristol, Bristol, UK

12 4) School of Medical Sciences, Örebro University, Sweden

13 5) Department of Medical Epidemiology and Biostatistics, Karolinska Institutet,  
14 Sweden

15 6) School of Psychological Science, University of Bristol, UK

16 7) The Alan Turing Institute, London, UK

17 8) Avon and Wiltshire Partnership NHS Mental Health Trust

18 9) Gillberg Neuropsychiatry Centre, Centre for Ethics, Law and Mental Health,

19 University of Gothenburg, Sweden

20 10) Department of Psychological Sciences, Birkbeck, University of London, UK

21 11) Department of Psychiatry and Seaver Autism Center for Research and

22 Treatment, Ichan School of Medicine at Mount Sinai, New York, USA

23 12) Department of Medical Epidemiology and Biostatistics, Karolinska Institutet,

24 Sweden

25 **Abstract**

26 Autistic traits are influenced by both genetic and environmental factors, and are  
27 known to vary geographically in prevalence. But to what extent does their  
28 aetiology also vary from place to place? We applied a novel spatial approach to  
29 data from two large twin studies, the Child and Adolescent Twin Study in  
30 Sweden (CATSS) and the Twins Early Development Study (TEDS) in the UK, to  
31 explore how the influence of nature and nurture on autistic traits varies from  
32 place to place. We present maps of gene- and environment- by geography  
33 interactions that suggest, for example, higher heritability and lower non-shared  
34 environmental influence in more densely populated areas. We hope this  
35 systematic approach to aetiological interactions will inspire research to identify  
36 previously unknown environmental influences on the aetiology of autistic traits.

## 37 **Background**

38 Autism spectrum disorder (ASD) is a neurodevelopmental condition that  
39 manifests in childhood. ASD is generally characterised by persistent difficulties  
40 with social communication and repetitive behaviours. Reported prevalence of  
41 ASD varies, but in developed countries the prevalence is estimated to be between  
42 1-1.5% <sup>1-4</sup> and this recorded prevalence has increased over the past few decades  
43 <sup>1,3,4</sup>. Factors such as diagnostic criteria, age, time of study and location of study  
44 may all contribute to this heterogeneity in prevalence estimates. ASD has a  
45 significant impact on child development, often including language difficulties and  
46 other co-occurring conditions which may persist into adulthood <sup>5</sup>.

47 The aetiology of ASD reflects both genetic and environmental influences. Twin  
48 studies suggest that genetic differences between people explain around 80% of  
49 the population variance for ASD <sup>6</sup>. Most studies suggest that the remaining  
50 variance is explained by variation in the non-shared environment. That is,  
51 environmental influences that do not contribute to similarity within families.  
52 Similarly, a recent study of over 3.5 million twin and sibling pairs in Sweden  
53 found that 83% of the variance is explained by genetic differences and 17% by  
54 non-shared environmental influences <sup>7</sup>. Another study across 5 different  
55 countries (Sweden, Finland, Denmark, Western Australia and Israel) estimated  
56 heritability for ASD to be around 80%, using data from whole populations,  
57 although there was variation between countries <sup>8</sup>.

58 ASD is known to vary in prevalence across geographical regions. For example,  
59 spatial analyses of ASD have revealed areas of increased prevalence in Salt Lake

60 County in Utah <sup>9</sup>, in northern Taiwan <sup>10</sup> and in areas of California <sup>11,12</sup>. ASD also  
61 appears more common in those born in New England compared to those born in  
62 the south east of the United States (US) <sup>13</sup>. Similarly, a study of Greater Glasgow  
63 in Scotland identified variation in prevalence across the city <sup>14</sup>. Several studies  
64 have also suggested differences in prevalence between urban and rural areas,  
65 where living in or growing up in an urban environment is associated with  
66 greater risk of ASD compared to rural environments <sup>10,15-18</sup>. Possible reasons for  
67 geographical variation in prevalence of ASD across these areas include regional  
68 diagnostic bias, differences in the access to health services or diagnostic  
69 resources, different levels of parental awareness, air pollution exposure during  
70 pregnancy, green space in an area and local trends in socioeconomic status  
71 (SES).

72 If prevalence of autistic traits varies from place to place, is the same true of the  
73 aetiology? For example, does variation in the environment explain variation in  
74 autistic traits in some areas more than others? Similarly, does the environment  
75 in some areas draw out genetic differences between children in their propensity  
76 for developing autistic traits? We previously developed a spatial approach to  
77 twin model-fitting called spACE that showed genetic and environmental  
78 influences vary spatially within a country in response to geographically-  
79 distributed environments <sup>19</sup>. This approach has the potential to highlight gene-  
80 environment (G×E) and environment-environment (E×E) interactions for  
81 outcomes such as ASD traits. G×E and E×E represent variation in the aetiological  
82 genetic influences on a trait depending on environmental exposure. For example,  
83 genetic risk of a mental health disorder may be drawn out by a stressful

84 environment, genetic risk of asthma may be apparent only in polluted  
85 environments, or genetic risk of hay fever may only reveal itself in pollen-rich  
86 areas. The spACE approach allows us to investigate this, mapping geographical  
87 patterns of nature and nurture without requiring the measurement of specific  
88 genetic variants or specific environmental characteristics. This systematic  
89 geographical approach may facilitate the discovery of novel specific genetic and  
90 environmental influences.

91 Here we apply the spACE approach to data on autistic traits in Sweden and the  
92 UK. Autistic traits and diagnostic categories of ASD show substantial aetiological  
93 overlap<sup>20,21</sup>, with genetic correlations from bivariate twin models of 0.52-0.89  
94 and SNP based genetic correlations of 0.27-0.30. The heritability of ASD traits  
95 does not change as a function of severity<sup>22-24</sup>, and genetic links have been  
96 identified between extreme and sub-threshold variation in ASD<sup>22,24</sup>, so to  
97 maximise power we have focussed on trait measures rather than diagnoses.

98 It seems likely that environments previously identified as important for the  
99 development of autistic traits will also influence aetiology. For example, given  
100 previous research on the social stress of urban compared to rural upbringing<sup>25</sup>,  
101 we hypothesise that urban-rural differences will be apparent in the aetiology of  
102 autistic traits. However, more importantly, we hope that by systematically  
103 mapping geographical differences in aetiology we will facilitate identification of  
104 new environments and shed light on the mechanisms by which they act.

## 105 **Methods**

### 106 *The Swedish Twin Registry and CATSS*

107 The Swedish twin registry, established in the 1950s, currently includes over 194,000  
108 twins<sup>26</sup>. Phenotypic information on the twins comes from a variety of sources such as  
109 medical registers and questionnaires and is regularly updated. Several sub-studies of  
110 the registry have been established, including the longitudinal Child and Adolescent  
111 Twin Study in Sweden (CATSS)<sup>27</sup>. CATSS was launched in 2004 to investigate  
112 childhood-onset neurodevelopmental problems such as ADHD and ASD in childhood  
113 and adolescence, for all twins turning 9 or 12 years since 2004. Parents of all Swedish  
114 twins aged 9 and 12 years old were asked to participate in a telephone interview to  
115 collect information on various health-related issues. By the time data on autistic traits  
116 were obtained in 2013, 8,610 parents had responded to this request, accounting for  
117 17,220 twins. The CATSS-9/12 study obtained ethical approval from the Karolinska  
118 Institute Ethical Review Board: Dnr 03-672 and 2010/507-31/1, CATSS-9 – clinical  
119 2010/1099-31/3 CATSS-15 Dnr: 2009/1599-32/5, CATSS-15/DOGSS Dnr: 03-672 and  
120 2010/1356/31/1, and CATSS-18 Dnr: 2010/1410/31/1.

121 For ASD traits, 16,677 participants had data available (including 8,307 complete pairs  
122 and 63 incomplete pairs of twins). Interviews were carried out when the twins were  
123 around the age of 9 or 12 years and 51% were male.

### 124 *CATSS measures of autistic traits*

125 The Autism-Tics, ADHD and other Comorbidities (A-TAC) inventory, based on the  
126 Diagnostic and Statistical Manual of Mental Disorders (DSM)-IV criteria, was used in the

127 telephone interview with parents to collect information on a range of  
128 neurodevelopmental problems. This inventory has previously been validated in both  
129 clinically diagnosed children and the general population <sup>28-32</sup>. The inventory includes 17  
130 items that assess ASD symptoms, where respondents can answer 'yes/1', 'yes, to some  
131 extent/0.5', and 'no/0'. Following the standard approach, we created a symptom score  
132 for each individual by summing these item scores. Further details can be found in  
133 previous publications <sup>32</sup>.

134 In our sample the median score was 0.00 (interquartile range [IQR]=1.00) for autistic  
135 symptoms, where, in previous validation studies a low and high cut-off of 4.5 and 8.5 for  
136 ASD have been established for broad screening and for use as a clinical proxy,  
137 respectively. This indicates that most people, in this general population sample, score  
138 well below these cut-offs. As expected, the distribution of this symptom score was zero-  
139 skewed, as shown in the histogram in **supplementary figure 1**.

#### 140 *CATSS location data*

141 To conduct the spACE analysis, we assigned a geographical location to each family. In  
142 CATSS we matched each twin pair to a Small Areas for Market Statistics (SAMS)  
143 location, for the most recent location data we had available up to 2009, using data from  
144 Statistics Sweden (<http://www.scb.se/en/>) and assigned coordinates based on the  
145 centroid of the SAMS location. There are approximately 9,200 SAMS in Sweden,  
146 subdivisions of 290 municipalities. The average population within each SAMS is 1,000  
147 people and therefore the area covered by each SAMS varies by population density.



148 To provide context for the results for Sweden, it is useful to understand a little about its  
149 geography. **Figure 1** shows a map of Sweden and some general indicators of the  
150 country's geography; the **supplementary materials** contain a detailed description. In  
151 summary, Sweden is split into a more rural north and central area, known as the  
152 lowlands and the more populated areas in a belt from Gothenburg in the west to  
153 Stockholm in the east and the very south near Malmö. Much of Sweden is covered by  
154 forest and lakes. The capital, Stockholm, is in the east with a mix of tourist-centred and  
155 residential areas and a number of islands. Gothenburg, the second largest city with a  
156 port, also has varied areas like Stockholm and an archipelago. Further inland is rural  
157 Värmland. South-west Sweden is a coastal and lowland area and is the third most  
158 populated area in Sweden. The main city in this area is industrialised and multicultural  
159 Malmö. South-east Sweden is heavily forested with some large lakes and a number of  
160 large towns. Sweden's two largest islands are also found here, Öland and Gotland, which  
161 are popular summer destinations, due to their warmer climate. They both have fairly  
162 rural landscapes with small towns and villages. The Bothnian coast is the most  
163 populated area in the north, with some large towns along the coastline. Central Sweden  
164 is a sparsely populated, rural, lowland area covered in forests, with numerous lakes and  
165 mountains along the Norwegian border. Further north is Swedish Lapland, a very  
166 remote area with a mountainous, rural landscape.

167 **Figure 1.** Map of Sweden with top 10 cities by population

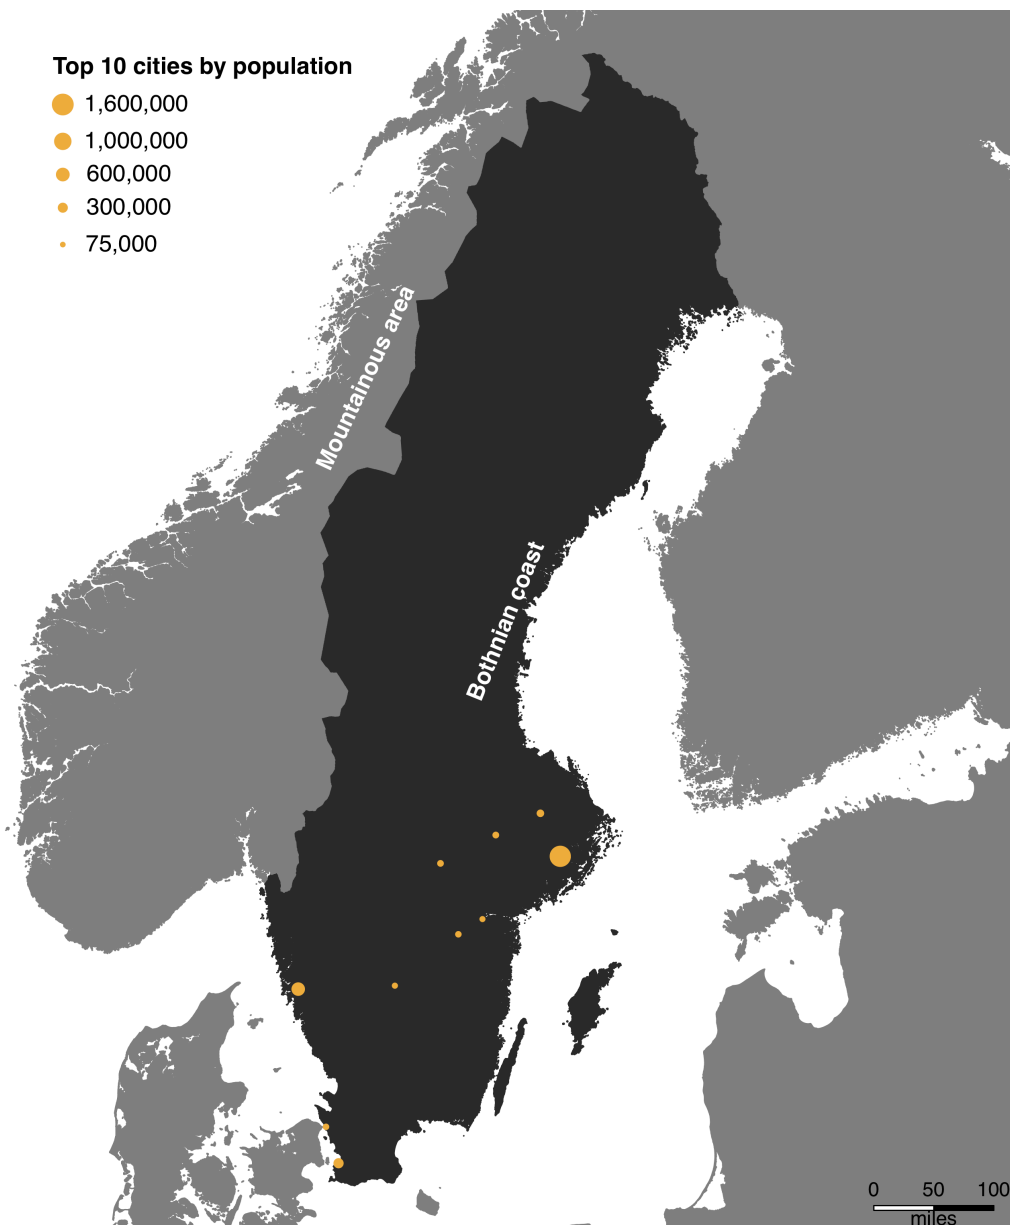

168

169 *Sweden is shown in dark grey with the surrounding countries in a lighter shade of grey. The top 10 most*  
170 *populated cities are shown on the map with orange circles, the area of which reflects the population of the*  
171 *city.*

172 *The Twins Early Development Study*

173 The Twins Early Development Study (TEDS) contacted parents of twins born in England  
174 and Wales between January 1994 and December 1996<sup>33</sup>. 16,810 pairs of twins were  
175 initially recruited, and currently there are over 10,000 twin pairs still enrolled in TEDS.  
176 The participants are demographically representative of the UK population of a similar  
177 age, with the majority identifying themselves as white British and with English as their  
178 first language. TEDS has collected wide-ranging data on cognitive and behavioural  
179 development, using approaches that include questionnaire booklets, telephone testing  
180 and web-based tests. The twins, their parents and teachers have all participated in data  
181 collection. Ethical approval for TEDS research is provided by the Institute of Psychiatry,  
182 Psychology and Neuroscience Ethics Committee, King's College London.

183 Full phenotypic data for autistic traits were available for 11,594 TEDS participants  
184 (including 5,796 complete pairs and 62 incomplete pairs of twins). For these twins the  
185 mean age was 11.30 (SD=0.72) and 48% were male.

186 *TEDS measures of autistic traits*

187 Parents in TEDS completed the Childhood Autism Spectrum Test (CAST) when the twins  
188 were age 12 years. The CAST consists of 30 items, scored 1 for yes or 0 for no<sup>34</sup>. For  
189 participants included in our analyses, the median score for ASD symptoms was 4.0  
190 (IQR=4.84). The CAST score considered indicative of ASD is 15.

191 *TEDS location data*

192 We assigned each twin pair geographical coordinates based on the centroids of their  
193 postcodes at age 12. There are over 1.5 million postcode units in the UK, covering, on  
194 average, 15 properties. As with SAMS, the area covered by each postcode varies  
195 depending on population density.

196 To provide context for the results for the UK, **Figure 2** displays a map and some general  
197 indicators of the country's geography; the **supplementary materials** include a detailed  
198 description. The UK is split into England, Wales, Scotland and Northern Ireland  
199 (although we do not describe Northern Ireland here because it was not included in the  
200 TEDS recruitment area and few participants have moved there since recruitment).

201 Generally, the south of the UK has a milder climate compared to the north and has more  
202 low-lying land. The UK is a mix of some very urban, previously (or still) industrial areas  
203 and more rural traditional countryside areas. London, a diverse, multicultural city in the  
204 south-east, is the capital, with its own distinct boroughs. The south-east of England has  
205 many commuter areas and is surrounded by coastline. This area is historically rich and  
206 has a mix of industrial and countryside areas and a number of seaside towns. The south  
207 of the UK is fairly rural, has many historical sites and also many coastal towns as well as  
208 the New Forest. More inland are the areas of Oxfordshire, with the city of Oxford and  
209 the picturesque, rural Cotswolds. In the west are the areas of cosmopolitan Bristol, spa-  
210 city Bath and rural Somerset, with the wooded Mendips, the Quantock and Exmoor  
211 National Park, on the Bristol channel. South-west England consists of pre-industrial  
212 Devon and Cornwall, popular Summer destinations with many seaside and fishing  
213 towns and plenty of farmland, and Dartmoor National Park. East Anglia is an area of  
214 flatland, wetlands and coastal areas.

215 The west Midlands are a mix of lowlands and hilly areas with the industrial city of  
216 Birmingham (England's second largest city) and the Peak district. The east midlands has  
217 a number of large urbanised cities and is an old coal mining area, but rural areas can  
218 still be found. North-west England has the large cities of Manchester and Liverpool and  
219 the seaside resort of Blackpool, but also the unspoilt, mountainous Isle of Man. The  
220 scenic Lake district is also found in the north as well as the varied area of Yorkshire,  
221 with urbanised, coastal and rural areas. Wales is split into the more populated and  
222 coastal south, hilly, rural Mid-Wales and mountainous north Wales. Scotland is split into  
223 the Highlands in the north and the Lowlands in the south. Southern Scotland is home to  
224 the main cities of cosmopolitan and medieval Edinburgh and urban Glasgow and this  
225 area has coastal towns, forests and agricultural land. Central Scotland is more varied  
226 with large lochs and forests in the west, rural and industrialised areas and fishing  
227 villages in the east and peaks in the north. Argyll in the west is a remote area,  
228 transitioning between lowland and highland and with numerous islands. North east  
229 Scotland has a number of industrial cities and port towns, although further north  
230 becomes mountainous. The Highlands are a very remote but unspoilt area, with forests,  
231 lochs, mountains and rugged coastline. Scotland has a number of island clusters, the  
232 Inner and Outer Hebrides in the west and the Orkney and Shetland islands in the north.

233 **Figure 2.** Map of the UK with top 10 cities by population

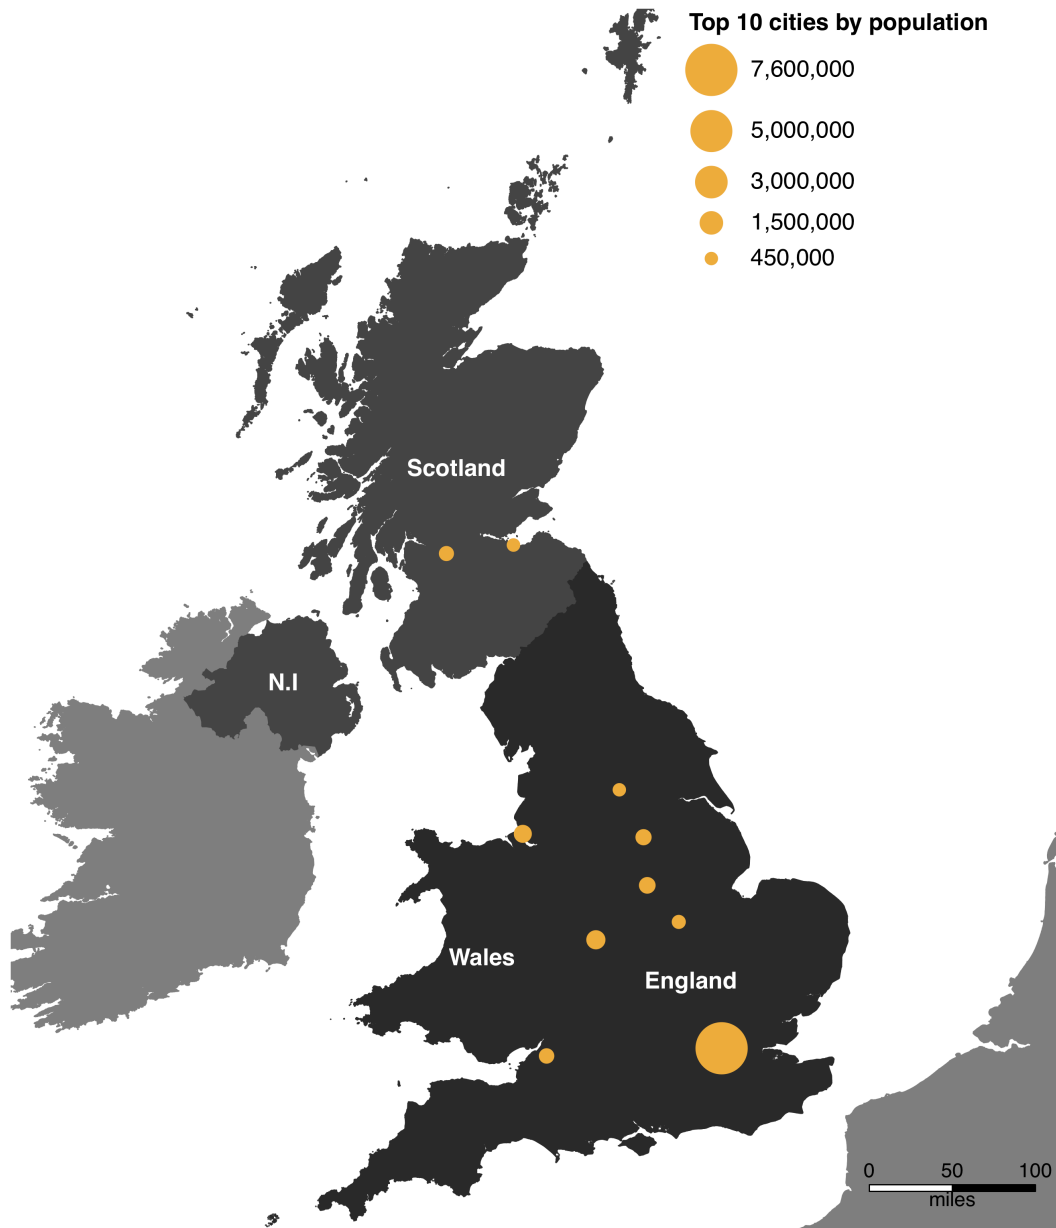

235 *The recruitment area (England and Wales) for the Twins Early Development Study (TEDS) is shown in dark*  
236 *grey, with the rest of the UK (Scotland and Northern Ireland [N.I]) in a lighter shade of grey. Other countries*  
237 *are shown in the lightest shade of grey. The top 10 most populated cities are shown on the map with orange*  
238 *circles, the area of which reflects the population of the city.*

## 239 **Statistical analyses**

### 240 *ACE models and maps in CATSS and TEDS*

241 In twin analysis, within-pair similarity of monozygotic (MZ) and dizygotic (DZ) twins is  
242 compared to estimate parameters for additive genetic (A), shared environmental (C)  
243 and non-shared environmental (E) influences on a trait. In this context, the shared  
244 environment refers to influences other than DNA similarity that make children growing  
245 up in the same family more similar to each other, whilst the non-shared environment  
246 refers to influences that do not contribute to similarity within families. Although  
247 tempting, it is not possible to assign specific environments to one or the other  
248 environmental component, because most environments themselves show both shared  
249 and non-shared (and often genetic) influences. We can estimate the contribution of  
250 genetic and environmental influences because of the different ways these influences are  
251 shared in MZ and DZ twin pairs. For MZ twins, who share 100% of their segregating  
252 alleles, A influences correlate 1, whereas for DZ twins they correlate 0.5 because DZ  
253 twins share, on average, 50% of their segregating alleles. For both MZ and DZ twins  
254 growing up in the same family the shared environmental correlation is 1. In contrast,  
255 the non-shared environment is uncorrelated and contributes to differences between  
256 twins<sup>35</sup>. In this study, we applied a version of the spACE analysis method<sup>19</sup> to explore  
257 how A, C and E for ASD traits vary geographically. To do this, we fit full information  
258 maximum likelihood structural equation models to twin data in R (version 3.3.1) using  
259 the OpenMx package (version 2.9.4), calculating A, C and E at many different target  
260 locations across an area. The contribution of each twin pair to a model is weighted by a  
261 function of the inverse Euclidean distance of the twin pair from the target location. In  
262 this study we built on our previous work by applying the weights within the structural

263 equation modelling framework, rather than by calculating weighted correlation  
264 matrices and using those as input (although for normally distributed measures the  
265 results are the same with either approach). In twin analysis it is possible to model non-  
266 additive genetic effects (D) instead of shared environmental effects (C), and D influences  
267 are sometimes found with ASD. However, the D component is highly correlated with the  
268 A component, which means confidence intervals are wide and the tendency of variance  
269 to swap between these two components makes it difficult to compare results across  
270 locations. Because of this, we have fitted ACE models, although in this case, A should be  
271 considered broad-sense heritability, including both additive and non-additive genetic  
272 influences.

273 For target locations in Sweden we used the centroid of each unique SAMS that included  
274 at least one twin pair. Because UK postcodes give more precise locations than Swedish  
275 SAMS, we instead selected UK target locations representative of local population density  
276 to preserve participant anonymity. All twin pairs contributed to the results at each  
277 location, but contributions were weighted according to the distance of each twin pair  
278 from the target location:

$$279 \quad w_i(x) = \frac{1}{d(x, x_i)^p}$$

280 where  $x$  represents the target location,  $x_i$  represents the location of a twin pair,  $d$  is the  
281 Euclidean distance between  $x$  and  $x_i$ , and  $p$  is the power parameter that controls the rate  
282 of drop-off of a twin pair's influence over distance (0.5 for these analyses). We included  
283 sex as a covariate in all the models (accounting for on average 2.59% of the variance),  
284 and age in the TEDS data (where it accounted for on average 0.34% of the variance).



285 Further detail on the spACE approach can be found in the original article <sup>19</sup>. We plotted  
286 maps to visualise the results (**figures 3 and 4**). In the maps each target location is  
287 coloured according to the value of the estimate at that location compared to the full  
288 range of values across the map. Low values appear blue and high values appear red,  
289 with increasing brightness of the colour representing increasing distance from the  
290 mean. To avoid outliers having a large effect on the distribution of colours in the maps,  
291 we assigned the highest 4% of values to the brightest red and the lowest 4% of values to  
292 the brightest blue before assigning colour values to equal ranges between the two. The  
293 histograms show the distribution of results and the corresponding colours.

294 We estimated 95% confidence intervals for A, C and E at each target location and using  
295 the CATSS data we performed sensitivity analyses for how A, C and E estimates vary  
296 based on the historical residential location used for the twin pairs. To do this we  
297 repeated analyses based on participants' locations at different ages and we combined  
298 the resulting maps into a video (**supplementary video 1**). Changes across time may  
299 allow identification of critical developmental periods when the geographical  
300 environment is particularly influential; for example, if clear patterns are seen when  
301 participant locations for the analysis are based on their location at a specific age.

### 302 *Sex limitation models*

303 While some previous studies have identified no aetiological sex differences for ASD,  
304 others have. For example, one study using the Missouri twin study and a continuous  
305 measure of autistic traits, found no sex differences <sup>36</sup>, and neither did previous work in  
306 TEDS<sup>24</sup>, but modest sex differences were found in previous work with the Swedish Twin  
307 Study<sup>37</sup>. To maximise power, in the main text we report results that equate the

308 aetiological influences for males and females. But for the Swedish data, where we  
309 replicated quantitative sex differences in aetiology, we conducted further separate  
310 analyses for males and females, and we include these in supplementary materials  
311 (**supplementary figures 4 and 5**).

### 312 **Data availability**

313 The data used in this study are available to researchers directly from CATSS and TEDS.  
314 Procedures for accessing the data are described at <https://ki.se/en/meb/the-child-and-adolescent-twin-study-in-sweden-catss> (CATSS) and  
315 <https://www.teds.ac.uk/researchers/teds-data-access-policy> (TEDS).  
316

### 317 **Code availability**

318 Code that implements the spACE model described here is available in the scripts  
319 directory at <https://github.com/DynamicGenetics/spACEjs/>.

## 320 **Results**

### 321 *Mapping the aetiology of autistic traits in Sweden*

322 We plotted the results from each of the 4,199 locations on a map (**Figure 3**, an  
323 interactive version is available at <https://dynamicgenetics.github.io/spACEjs/>), where  
324 red points represent locations where results fall above the population mean, and blue  
325 points represent locations where they fall below. The brighter the points, the further  
326 they are from the population mean. This is shown in the histograms below the maps,  
327 where the colours of the bars match the points in the map above. Because we modelled  
328 raw variance after standardising data to mean 0 and SD 1 at the population level (i.e. we  
329 did not standardize the A, C and E estimates at each location to add up to one) genetic  
330 and environmental influences are not reciprocal at each location, so it is possible for a  
331 location to show both strong genetic and environmental influences. The consequence of  
332 this is that each map stands alone: differences in genetic influence really do imply  
333 differences in the genetic component, and not just a reflection of differences in a  
334 reciprocal environmental component. Maps with A and E constrained to add up to one  
335 in each location (i.e. proportional) are shown in **supplementary figure 2** and show  
336 similar results to those for the raw variance. For comparison, we have also plotted  
337 results of the weighted means of scaled autistic trait scores at the same locations in  
338 **supplementary figure 3** and we observe geographical variation for mean autistic trait  
339 scores, reflecting the expected variation in the prevalence of ASD.

340 **Figure 3.** Mapping genetic (A) and non-shared environmental (E) influences on autistic  
341 traits in Sweden suggests that genetic variation is more influential in more densely-  
342 populated areas

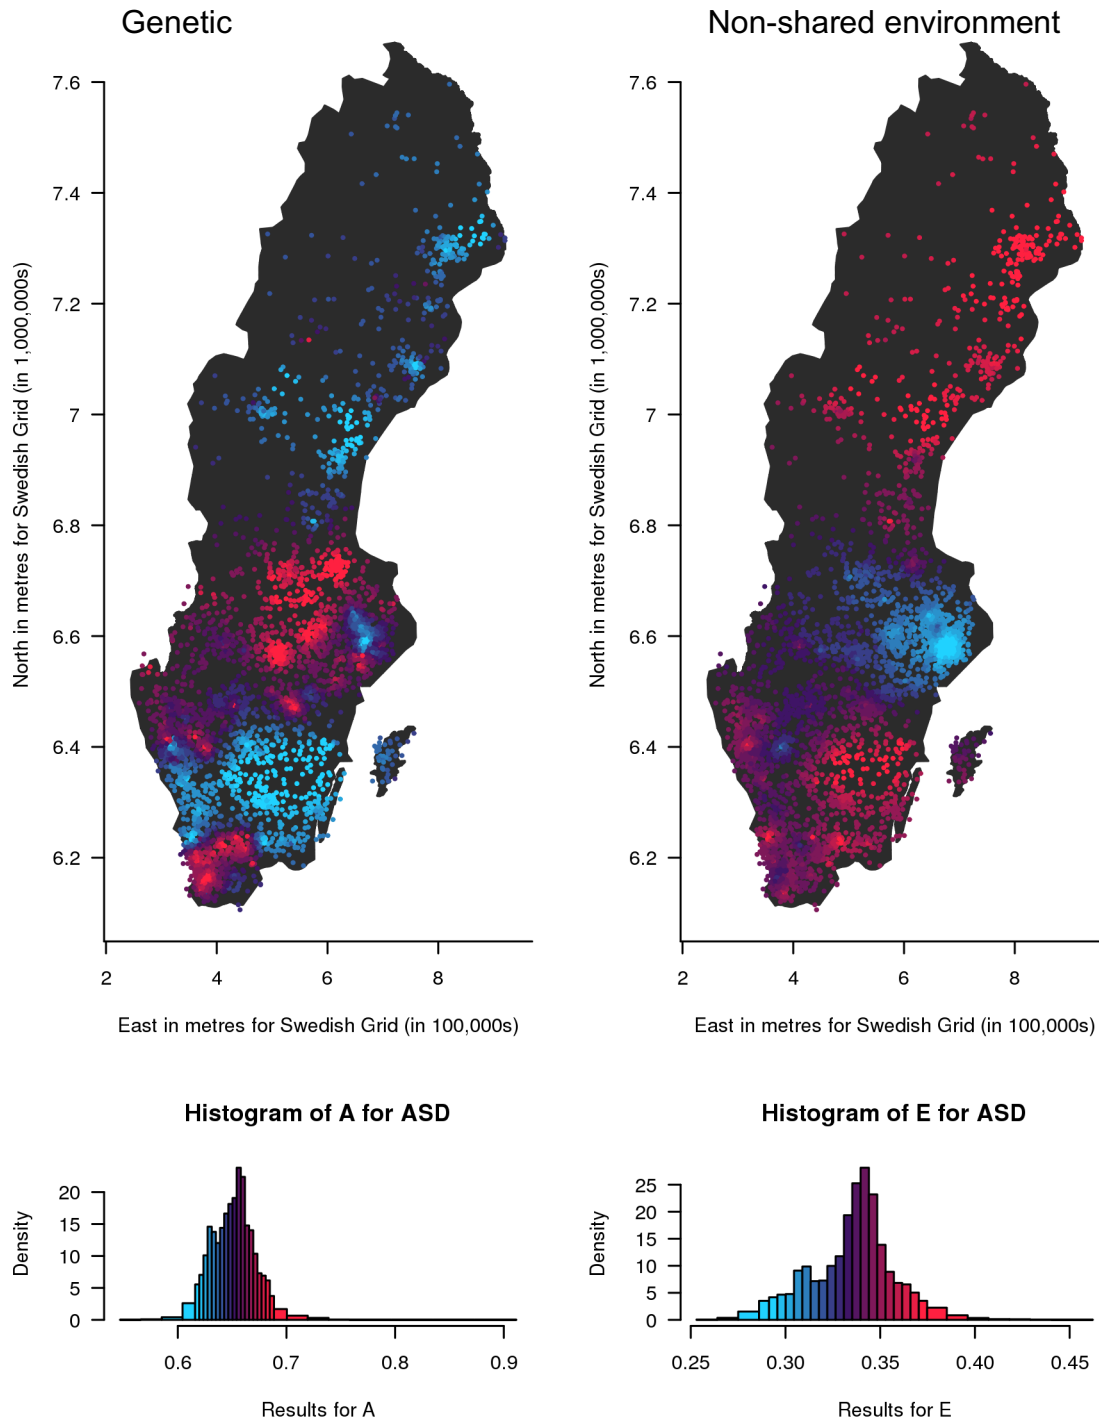

343

344 *Geographical variation in genetic (A) and non-shared (E) influences on childhood ASD traits in Sweden*  
345 *(results are overlaid on an outline of the SAMS areas). The contributions of A and E range from low (blue) to*  
346 *high (red). The histograms below show the distribution of the estimates, coloured in the same way as the*  
347 *points on the map. The estimates are not standardised and are therefore not constrained to add up to one.*  
348 *Shared environment (C) estimates were approximately zero across the whole map, so they are not shown*  
349 *here. An interactive version of this map is available at <https://dynamicgenetics.github.io/spACEjs/>.*

350 The results suggest that the amount of variation in autistic traits explained by genetic  
351 influences (A) is generally greater in urban areas and lesser in the sparsely populated  
352 north and more rural southern belt. The non-shared environment (E) frequently shows  
353 the opposite pattern, with the variation explained generally less in and around the  
354 capital and more in Southern and Northern rural areas. However, we also observe  
355 greater contribution of E in the areas around the cities of Gothenburg and Malmö.  
356 Variation in A and E can also be seen within local areas, such as around Stockholm,  
357 where there are both low and high values for A, suggesting genetic influences are  
358 moderated by other factors beyond urbanicity. The histograms for the raw variance  
359 indicate that the variance explained by genetic influences ranges from 0.55 to 0.91, with  
360 most values around the mean of 0.65 (SD=0.02). The variance explained by E ranges  
361 from 0.25 to 0.46, again with most values around the mean of 0.34 (SD=0.02). Variation  
362 in autistic traits explained by C was approximately zero over the whole of Sweden.  
363 Confidence intervals for estimates at each location are provided in **supplementary**  
364 **table 1. Supplementary video 1** shows that the overall patterns for variation in A and  
365 E remained similar irrespective of the historical location used for each twin pair.

#### 366 *Sex limitation models for ASD traits*

367 Population-level sex limitation model results for autistic traits are shown in  
368 **supplementary table 2**. We used nested sub-models to test for sex differences in  
369 aetiology. The common effects model is the most parsimonious model that adequately  
370 fits the data, indicating quantitative, but not qualitative, sex differences. However,  
371 because this is a large and well-powered sample, the parameter estimates for males and  
372 females that are “significantly” different at an alpha of 0.05 are actually within 1% of  
373 each other. To maximise power, we have presented the maps for males and females

374 combined in the main text, but maps for males and females separately are shown in  
375 **supplementary figures 4 and 5.**

376 *Mapping the aetiology of autistic traits in the UK*

377 **Figure 4** maps genetic and environmental influences on autistic traits in the UK at 6,758  
378 locations chosen to represent sample density across the UK (an interactive version of  
379 this map is available at <https://dynamicgenetics.github.io/spACEjs/>). Again, this is a  
380 map of the raw variance, so A, C and E are not constrained to add up to one. However,  
381 maps with A, C and E constrained to add to one at each location are shown in  
382 **supplementary figure 6**, with very similar results.

383 **Figure 4.** Similar to findings in Sweden, genetic influences for autistic traits in the UK  
384 appear more influential in more densely populated areas, although patterns of non-  
385 shared environmental influences follow a north-south divide

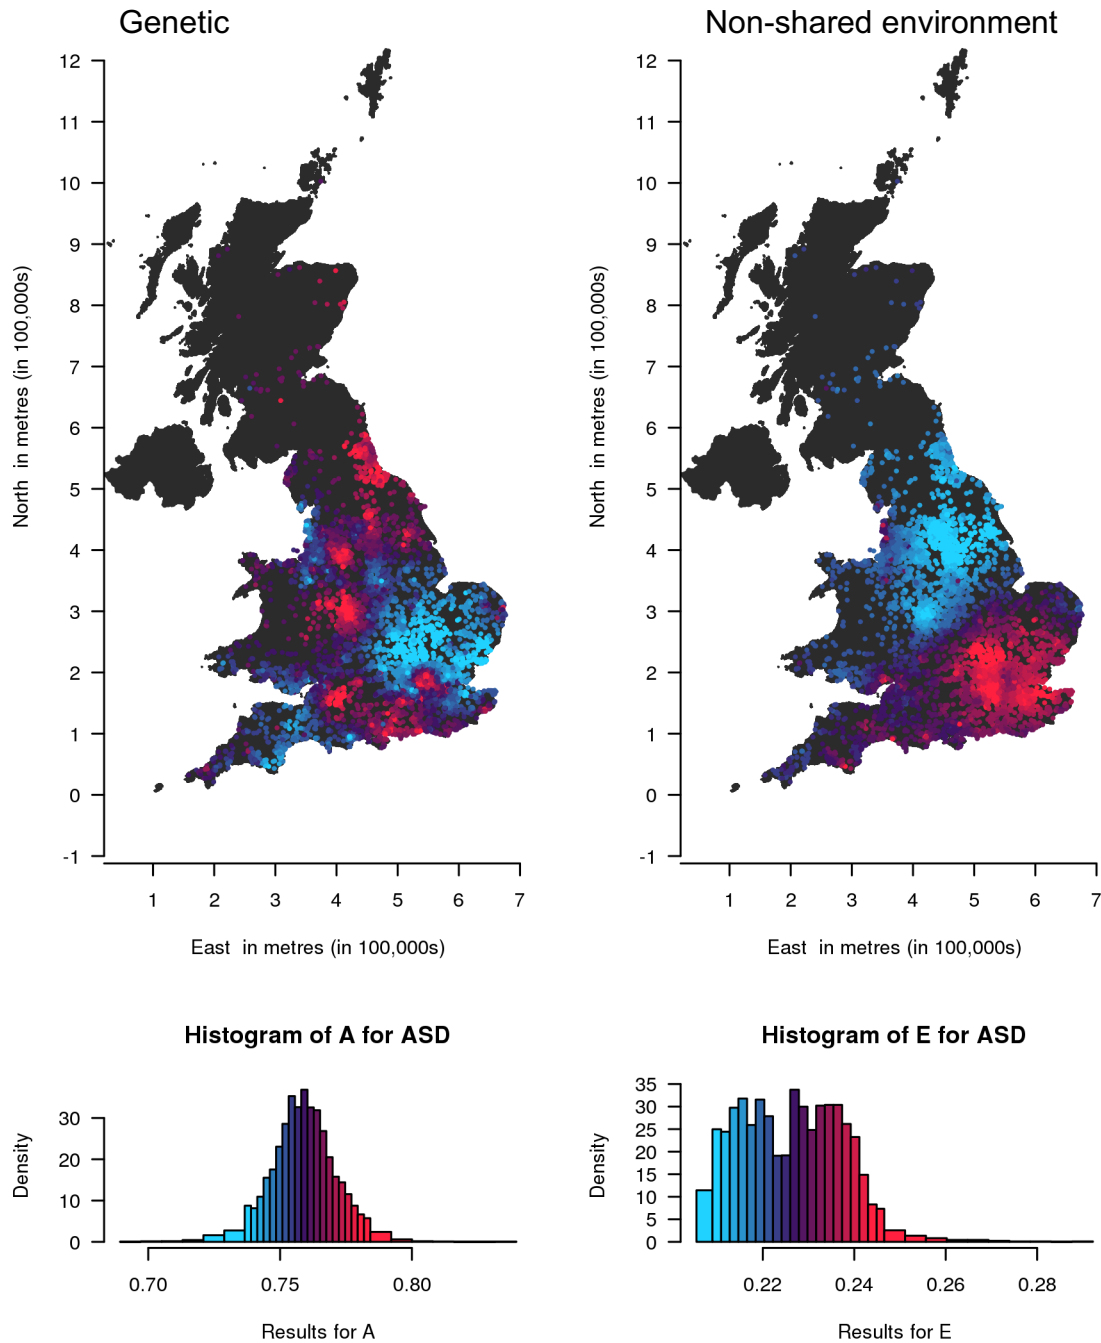

386

387 *Geographical variation in genetic (A) and non-shared (E) influences on childhood autistic traits in the UK.*

388 *The contributions of A and E range from low (blue) to high (red). The histograms below show the*

389 *distribution of the estimates, coloured in the same way as the points on the map. The A and E estimates are*

390 *not standardised and are therefore not constrained to add up to one at each location. An interactive version*

391 *of this map is available at <https://dynamicgenetics.github.io/spACEjs/>.*

392 The raw results for A are consistent with those from the CATSS sample in Sweden  
393 where we observed higher heritability in more densely populated areas. The mean of A  
394 is slightly higher in the UK than in Sweden: 0.76 (SD=0.01) compared to 0.65 (SD=0.02).  
395 For non-shared environment (E) the patterns are less similar across countries, as are  
396 the mean values 0.23 (SD=0.01) in the UK, compared to 0.34 (SD=0.02) in Sweden.  
397 London, the capital city, and the surrounding south-east of the UK show greater  
398 influence of E compared to the north and some regions in the mid-west of England and  
399 Wales. In contrast, Sweden's capital, Stockholm, and the surrounding areas show lower  
400 estimates of E. Again, C is approximately zero for autistic traits across all regions. As  
401 before, local variation in A and E is apparent within large cities such as London. As the  
402 histograms show, A is fairly normally distributed between 0.69 and 0.84 across regions.  
403 E ranges more narrowly from 0.21 to 0.29 in a bimodal distribution with a positive  
404 skew. Confidence intervals for estimates at each location are provided in  
405 **supplementary table 3.**



## 406 **Discussion**

407 In this study we looked at how genetic and environmental influences on symptoms of  
408 ASD vary geographically in Sweden and the UK. Our results are consistent with previous  
409 population-level estimates of genetic and environmental influences, and demonstrate  
410 geographical variation in genetic and non-shared environmental influences on autistic  
411 traits in Sweden and the UK.

412 These geographical differences in genetic and environmental influences on autistic  
413 traits are indicative of gene-environment and environment-environment interactions  
414 where the interacting environmental variable varies by location. Where we find areas of  
415 increased genetic or environmental influences for autistic traits this means that the  
416 environment in these areas draws out genetic or environmental influence, in the same  
417 way that the presence of airborne pollen would reveal individual differences in genetic  
418 risk for hay fever. By studying this in a systematic way, rather than relying on a specific  
419 measured environment, we can use our results to develop novel hypotheses about  
420 currently unknown environmental influences.

421 Our findings complement previous research that has focused on geographical  
422 prevalence differences in ASD<sup>9-14,38</sup>. Similarly, alongside aetiological differences, we  
423 observe geographical variation in mean autistic trait scores. These mean differences  
424 may be linked to aetiological differences. For example, areas of greater prevalence could  
425 represent regions where the environment triggers genetic predisposition to ASD traits.  
426 This provides a basis for future research into specific geographically distributed  
427 environments that draw out or mitigate genetic or environmental risk, which could in  
428 turn be useful for population health measures seeking to reduce the impact of ASD.

429 From our results we can hypothesise about what these factors could be. For example,  
430 we find that there is generally higher heritability in more densely populated areas of  
431 Sweden, such as Gothenburg, Malmö, and Stockholm, and in a band running from  
432 Gothenburg to Stockholm where the majority of the population live. We find lower  
433 heritability in the southern highlands and northern regions, which are less populated.  
434 This may suggest that urban environments draw out genetic differences in  
435 predisposition to autistic traits between people of the same ancestral background.  
436 These geographically distributed environments might include psychosocial factors such  
437 as the stress of urban living or income inequality, or aspects of the physical  
438 environment such as air pollution. This explanation fits with neuroscience literature  
439 that suggests that living in an urban environment is associated with specific neural  
440 correlates in response to stress, which may influence the onset of related mental health  
441 disorders <sup>25</sup>. The literature on prevalence suggests that other potentially important  
442 factors may include geographical differences in access to healthcare, diagnostic bias and  
443 parental awareness, socio-economic status, neighbourhood deprivation, infrastructure  
444 of the area, or access to green space. However, factors such as rater effects or access to  
445 healthcare are less likely to play a role in this aetiological variation as we have used  
446 data from structured interviews in population representative samples, and  
447 environmental influences on prevalence are not necessarily the same as environmental  
448 influences on aetiology. For non-shared environmental influences urban-rural  
449 differences are confined to areas in and around Stockholm, the Swedish capital.  
450 Therefore, it may be that there are environments related specifically to living in or  
451 around the capital that result in decreased non-shared environmental influences  
452 compared to other areas in Sweden.

453 We see similar patterns for genetic influences on in the UK, with higher heritability  
454 estimates in city areas such as central and south London, Birmingham, Bristol,  
455 Manchester, Newcastle. Estimates are generally lower in East Anglia, the south west,  
456 Wales and other less densely populated areas. Again, as in Sweden, non-shared  
457 environmental influence shows a more complex pattern in the UK.

458 Whilst we see similarities in patterns of aetiology between Sweden and the UK for  
459 autistic traits, there are also substantial differences. There are several possible reasons  
460 for this. For example, it could be due to differences in the measurement of ASD  
461 symptoms in the cohorts, or it could be due to environmental differences between the  
462 two countries, for example differences in the level of awareness of ASD and therefore  
463 possible differential reporting in ASD symptoms, or differences in the physical or social  
464 environments, which may vary between countries in the same way as they do within  
465 each country. It will be important to investigate this in other countries to explore these  
466 international similarities and differences further.

467 When interpreting these results there are a few important points to consider. First, in  
468 some areas the effective sample size is lower than others, for example in densely  
469 populated areas the proximity of some twin pairs relative to others can weight their  
470 influence relatively highly. However, across all areas we have taken care to maintain  
471 effective sample sizes in the thousands for both identical and fraternal twin pairs, so  
472 estimates remain reasonably precise. Second, due to how the weighting of participants'  
473 contributions to the analyses works, i.e. participants contribute more to analysis the  
474 closer they are to the target location, this results in smoothing over the estimates for A,  
475 C and E. The amount by which results over the area are smoothed depends on the  
476 tuning parameter used in the weighting. There is a trade-off when selecting the tuning

477 parameter between smoothing over noise and detecting real variation, or between  
478 accurately estimating variance components and accurately localising them. Here, we  
479 have chosen the tuning parameter to result in some smoothing towards the population  
480 mean, but this may mean that some larger localised variation remains undetected. In  
481 interpreting the maps, it is important to take into account both the pattern of results  
482 shown on the map, and the range of estimates shown by the histogram, while bearing in  
483 mind that the effect sizes are smoothed towards the population mean. Third, in common  
484 with the previous literature, we find that an ADE model is often a slightly better fit to  
485 the data, but here we have fitted ACE models and generally presented results for A and  
486 E alone because the high correlation between A and D brings noise to spatial analysis  
487 due to switching between the two across locations <sup>39</sup>. Instead, we interpret A here as a  
488 broad genetic component, without the usual connotation of additivity. Fourth, as with  
489 any statistical analysis, it is important to consider the assumptions of the model. For  
490 twin modelling, these include random mating within the population, that MZ and DZ  
491 twins share their environments to the same extent (at least where those environments  
492 are not genetically influenced), and that twins are representative of the general  
493 population for the traits studied <sup>35</sup>. These assumptions have generally been found to be  
494 reasonable <sup>40</sup>, although there is some evidence to suggest that there is assortative  
495 mating for ASD, for example a study in Sweden that found phenotypic correlations of  
496 0.48 for ASD <sup>41</sup>. This would have the effect of inflating the shared environmental  
497 influences, which we find to be approximately zero across locations. For our  
498 geographical analyses we do not assume that there is no gene-environment interaction  
499 or correlation, because we are explicitly modelling them as our main point of interest.

500 Our systematic analysis shows geographical variation in genetic and non-shared  
501 environmental influences for symptoms of ASD in both Sweden and the UK. These  
502 results will inform further studies of measured geographically distributed  
503 environments, beyond those already identified as influencing prevalence in the  
504 literature. For example, by correlating the spatial distribution of these environments  
505 with the spatial distribution of the aetiological estimates or by using formal continuous  
506 moderator models. Identifying these environments and understanding how they draw  
507 out or mask genetic predisposition may lead to population health and social policy  
508 innovation to support people with ASD.

## 509   **References**

- 510   1.    Lundström, S., Reichenberg, A., Anckarsäter, H., Lichtenstein, P. & Gillberg, C.  
511        Autism phenotype versus registered diagnosis in Swedish children: Prevalence  
512        trends over 10 years in general population samples. *BMJ* **350**, h1961 (2015).
- 513   2.    Brugha, T. S. *et al.* Epidemiology of autism spectrum disorders in adults in the  
514        community in England. *Arch. Gen. Psychiatry* **68**, 459–466 (2011).
- 515   3.    Idring, S. *et al.* Changes in Prevalence of Autism Spectrum Disorders in 2001–  
516        2011: Findings from the Stockholm Youth Cohort. *J. Autism Dev. Disord.* **45**, 1766–  
517        1773 (2015).
- 518   4.    Lyall, K. *et al.* The Changing Epidemiology of Autism Spectrum Disorders. *Annu.*  
519        *Rev. Public Health* **38**, 81–102 (2017).
- 520   5.    Seltzer, M. M., Shattuck, P., Abbeduto, L. & Greenberg, J. S. Trajectory of  
521        development in adolescents and adults with autism. *Ment. Retard. Dev. Disabil.*  
522        *Res. Rev.* **10**, 234–247 (2004).
- 523   6.    Tick, B., Bolton, P., Happé, F., Rutter, M. & Rijsdijk, F. Heritability of autism  
524        spectrum disorders: A meta-analysis of twin studies. *J. Child Psychol. Psychiatry*  
525        *Allied Discip.* **57**, 585–595 (2016).
- 526   7.    Sandin, S. *et al.* The Heritability of Autism Spectrum Disorder. *JAMA* **318**, 1182–  
527        1184 (2017).
- 528   8.    Bai, D. *et al.* Association of Genetic and Environmental Factors With Autism in a 5-

- 529 Country Cohort. *JAMA Psychiatry* 1–9 (2019).  
530 doi:10.1001/jamapsychiatry.2019.1411
- 531 9. Bakian, A. V., Bilder, D. A., Coon, H. & McMahon, W. M. Spatial Relative Risk  
532 Patterns of Autism Spectrum Disorders in Utah. *J. Autism Dev. Disord.* **45**, 988–  
533 1000 (2015).
- 534 10. Chen, C. Y., Liu, C. Y., Su, W. C., Huang, S. L. & Lin, K. M. Urbanicity-related variation  
535 in help-seeking and services utilization among preschool-age children with  
536 autism in Taiwan. *J. Autism Dev. Disord.* **38**, 489–497 (2008).
- 537 11. Mazumdar, S., King, M., Liu, K. Y., Zerubavel, N. & Bearman, P. The spatial  
538 structure of autism in California, 1993-2001. *Heal. Place* **16**, 539–546 (2010).
- 539 12. Mazumdar, S., Winter, A., Liu, K. Y. & Bearman, P. Spatial clusters of autism births  
540 and diagnoses point to contextual drivers of increased prevalence. *Soc. Sci. Med.*  
541 **95**, 87–96 (2013).
- 542 13. Hoffman, K. *et al.* Geographic Patterns of Autism Spectrum Disorder Among  
543 Children of Participants in Nurses' Health Study II. *Am. J. Epidemiol.* **186**, 834–  
544 842 (2017).
- 545 14. Campbell, M., Reynolds, L., Cunningham, J., Minnis, H. & Gillberg, C. Autism in  
546 Glasgow: Cumulative incidence and the effects of referral age, deprivation and  
547 geographical location. *Child. Care. Health Dev.* **39**, 688–694 (2011).
- 548 15. Lauritsen, M. B., Pedersen, C. B. & Mortensen, P. B. Effects of familial risk factors

- 549 and place of birth on the risk of autism: A nationwide register-based study. *J. Child*  
550 *Psychol. Psychiatry* **46**, 963–971 (2005).
- 551 16. Lauritsen, M. B. *et al.* Urbanicity and autism spectrum disorders. *J. Autism Dev.*  
552 *Disord.* **44**, 394–404 (2014).
- 553 17. Wu, J. & Jackson, L. Inverse relationship between urban green space and  
554 childhood autism in California elementary school districts. *Environ. Int.* **107**, 140–  
555 146 (2017).
- 556 18. Vassos, E., Agerbo, E., Mors, O. & Bøcker Pedersen, C. Urban-rural differences in  
557 incidence rates of psychiatric disorders in Denmark. *Br. J. Psychiatry* **208**, 435–  
558 440 (2016).
- 559 19. Davis, O. S. P., Haworth, C. M. A., Lewis, C. M. & Plomin, R. Visual analysis of  
560 geocoded twin data puts nature and nurture on the map. *Mol. Psychiatry* **17**, 867–  
561 874 (2012).
- 562 20. Colvert, E. *et al.* Heritability of autism spectrum disorder in a UK population-  
563 based twin sample. *JAMA Psychiatry* **72**, 415–423 (2015).
- 564 21. Robinson, E. B. *et al.* Genetic risk for autism spectrum disorders and  
565 neuropsychiatric variation in the general population. *Nat. Genet.* **48**, 552–555  
566 (2016).
- 567 22. Robinson, E. B. *et al.* Evidence that autistic traits show the same etiology in the  
568 general population and at the quantitative extremes (5%, 2.5%, and 1%). *Arch.*



- 569            *Gen. Psychiatry* **68**, 1113–1121 (2011).
- 570    23.    Lundström, S. *et al.* Autism spectrum disorders and autisticlike traits: Similar  
571            etiology in the extreme end and the normal variation. *Arch. Gen. Psychiatry* **69**,  
572            46–52 (2012).
- 573    24.    Ronald, A. *et al.* Genetic heterogeneity between the three components of the  
574            autism spectrum: A twin study. *J. Am. Acad. Child Adolesc. Psychiatry* **45**, 691–699  
575            (2006).
- 576    25.    Lederbogen, F. *et al.* City living and urban upbringing affect neural social stress  
577            processing in humans. *Nature* **474**, 498–501 (2011).
- 578    26.    Magnusson, P. K. E. *et al.* The Swedish Twin Registry: Establishment of a Biobank  
579            and Other Recent Developments. *Twin Res. Hum. Genet.* **16**, 317–329 (2012).
- 580    27.    Anckarsäter, H. *et al.* The Child and Adolescent Twin Study in Sweden (CATSS).  
581            *Twin Res. Hum. Genet.* **14**, 495–508 (2011).
- 582    28.    Hansson, S. L. *et al.* Psychiatric telephone interview with parents for screening of  
583            childhood autism - Tics, attention-deficit hyperactivity disorder and other  
584            comorbidities (A-TAC): Preliminary reliability and validity. *Br. J. Psychiatry* **187**,  
585            262–267 (2005).
- 586    29.    Anckarsäter, H. *et al.* Child neurodevelopmental and behavioural problems are  
587            intercorrelated and dimensionally distributed in the general population. *The Open*  
588            *Psychiatry Journal* **2**, 5–11 (2008).

- 589 30. Mårland, C. *et al.* The Autism-Tics, ADHD and other Comorbidities inventory (A-  
590 TAC): Previous and predictive validity. *BMC Psychiatry* **17**, 403 (2017).
- 591 31. Larson, T. *et al.* Predictive properties of the A-TAC inventory when screening for  
592 childhood-onset neurodevelopmental problems in a population-based sample.  
593 *BMC Psychiatry* **13**, 233 (2013).
- 594 32. Larson, T. *et al.* The Autism-Tics, AD/HD and other Comorbidities inventory (A-  
595 TAC): further validation of a telephone interview for epidemiological research.  
596 *BMC Psychiatry* **10**, 1 (2010).
- 597 33. Haworth, C. M. A., Davis, O. S. P. & Plomin, R. Twins Early Development Study  
598 (TEDS): A Genetically Sensitive Investigation of Cognitive and Behavioural  
599 Development From Childhood to Young Adulthood. *Twin Res. Hum. Genet.* **16**,  
600 117–125 (2013).
- 601 34. Scott, F. J., Baron-Cohen, S., Bolton, P. & Brayne, C. The CAST (Childhood Asperger  
602 Syndrome Test): preliminary development of a UK screen for mainstream  
603 primary-school-age children. *Autism* **6**, 9–31 (2002).
- 604 35. Rijdsdijk, F. V & Sham, P. C. Analytic approaches to twin data using structural  
605 equation models. *Brief. Bioinform.* **3**, 119–133 (2002).
- 606 36. Constantino, J. N. & Todd, R. D. Autistic Traits in the General Population. *Arch. Gen.*  
607 *Psychiatry* **60**, 524 (2003).
- 608 37. Ronald, A., Larsson, H., Anckarsäter, H. & Lichtenstein, P. A twin study of autism

- 609 symptoms in Sweden. *Mol. Psychiatry* **16**, 1039–1047 (2011).
- 610 38. Hoffman, K., Kalkbrenner, A. E., Vieira, V. M. & Daniels, J. L. The spatial distribution  
611 of known predictors of autism spectrum disorders impacts geographic variability  
612 in prevalence in central North Carolina. *Environ. Heal.* **11**, 80 (2012).
- 613 39. Rietveld, M. J. H., Posthuma, D., Dolan, C. V. & Boomsma, D. I. ADHD: Sibling  
614 interaction or dominance: An evaluation of statistical power. *Behav. Genet.* **33**,  
615 247–255 (2003).
- 616 40. Evans, D. M. & Martin, N. G. The validity of twin studies. *Genescreen* **1**, 77 (2000).
- 617 41. Nordsletten, A. E. *et al.* Patterns of nonrandom mating within and across 11 major  
618 psychiatric disorders. *JAMA Psychiatry* **73**, 354–361 (2016).
- 619

## 620 **Acknowledgements**

621 We gratefully acknowledge the ongoing contribution of the participants in the TEDS and  
622 CATSS and their research teams. This work was supported in part by the UK Medical  
623 Research Council Integrative Epidemiology Unit at the University of Bristol (Grant ref:  
624 MC\_UU\_12013/1). ZR is supported by a Wellcome Trust PhD studentship (Grant ref:  
625 109104/Z/15/Z). OSPD and CMAH are funded by the Alan Turing Institute under the  
626 EPSRC grant EP/N510129/1. This study was also supported by the National Institute  
627 for Health Research (NIHR) Biomedical Research Centre at the University Hospitals  
628 Bristol NHS Foundation Trust and the University of Bristol (BRC-1215-2011). The  
629 CATSS study is supported by the Swedish Foundation for International Cooperation in  
630 Research and Higher Education (STINT), the Swedish Council for Health, Working Life  
631 and Welfare, the Söderström-Königska Foundation, and the Swedish Research Council  
632 (Medicine and SIMSAM). TEDS is funded by Medical Research Council grant  
633 MR/M021475/1 to Robert Plomin. AbR is supported by the Beatrice and Samuel L  
634 Seaver Foundation.

## 635 **Author contributions**

636 Conceptualization: ZER, OSPD; Methodology: ZER and OSPD; Software: ZER and OSPD;  
637 Formal Analysis: ZER; Resources: OSPD, CMAH, ARo and PL; Data Curation: ZER;  
638 Writing—Original Draft: ZER; Writing—Review and Editing: OSPD, HL, CMAH, DR, SL,  
639 AnR, AbR and PL; Visualization: ZER and OSPD; Supervision: OSPD; Project  
640 Administration: OSPD; Funding Acquisition: OSPD.

641 **Competing interests**

642 Angelica Ronald has received a consultancy fee for writing for the National Childbirth

643 Trust and receives an annual honorarium as joint editor of the Journal of Child

644 Psychology and Psychiatry. H. Larsson has served as a speaker for Evolan Pharma and

645 Shire and has received research grants from Shire; all outside the submitted work.

646
